# Supplementary material for: Internal Quality Attributes and Sensory Characteristics of ‘Ambrosia’ Apples with Different Dry Matter Content after a Two-Week and a Ten-Week Air Storage at 1 °C
Source: Foods. 2023 Jan 3;12(1):219. doi: 10.3390/foods12010219 (PMC9818383; doi:10.3390/foods12010219)
Supplement: Supplementary file 1 [file foods-12-00219-s001.zip › foods-2085595-supplementary.pdf]

# Internal quality attributes and sensory characteristics of ‘Ambrosia’ apples with different dry matter content after a two-week and a ten-week air storage at 1°C

**Supplementary Table S1.** Initial pH of the combined juice samples from the apple fruits of each estimated dry matter content (DMC) category prior to titration.

| Location                                                 | DMC category | Initial pH<br>Average (SE)   |                               |
|----------------------------------------------------------|--------------|------------------------------|-------------------------------|
|                                                          |              | After 2-week storage         | After 10-week storage         |
| Cawston                                                  | 11.5% ± 0.5  | 4.08 (0.09)                  |                               |
|                                                          | 12.5% ± 0.5  | 3.92 (0.07)                  | 3.94 (0.01)                   |
|                                                          | 13.5% ± 0.5  | 3.95 (0.04)                  | 3.87 (0.03)                   |
|                                                          | 14.5% ± 0.5  | 3.96 (0.10)                  | 3.85 (0.02)                   |
|                                                          | 15.5% ± 0.5  | 3.85 (0.13)                  |                               |
|                                                          |              | F(4,11)=0.81, <i>p</i> =0.55 | F(2,7)=5.15, <i>p</i> =0.0498 |
| Summerland Research<br>and Development<br>Centre (SuRDC) | 13.5% ± 0.5  | 4.28 (0.03)                  |                               |
|                                                          | 14.5% ± 0.5  | 4.08 (0.14)                  | 3.83 (0.03)                   |
|                                                          | 15.5% ± 0.5  | 4.28 (0.10)                  | 3.94 (0.04)                   |
|                                                          | 16.5% ± 0.5  | 4.16 (0.02)                  | 3.87 (0.02)                   |
|                                                          | 17.5% ± 0.5  | 4.16 (0.09)                  |                               |
|                                                          |              | F(4,11)=0.99, <i>p</i> =0.45 | F(2,7)=3.60, <i>p</i> =0.094  |

Note: Measurements were conducted after 2-week storage and after 10-week storage. Each juice sample consisted 2-3 slices per fruit, of 3 fruits. There were 3 juice samples for each DMC level at each location after a specific storage duration (n = 3). The *p* value showed statistical significance among DMC levels of each location/duration (One-way ANOVA, Tukey’s pairwise comparison).

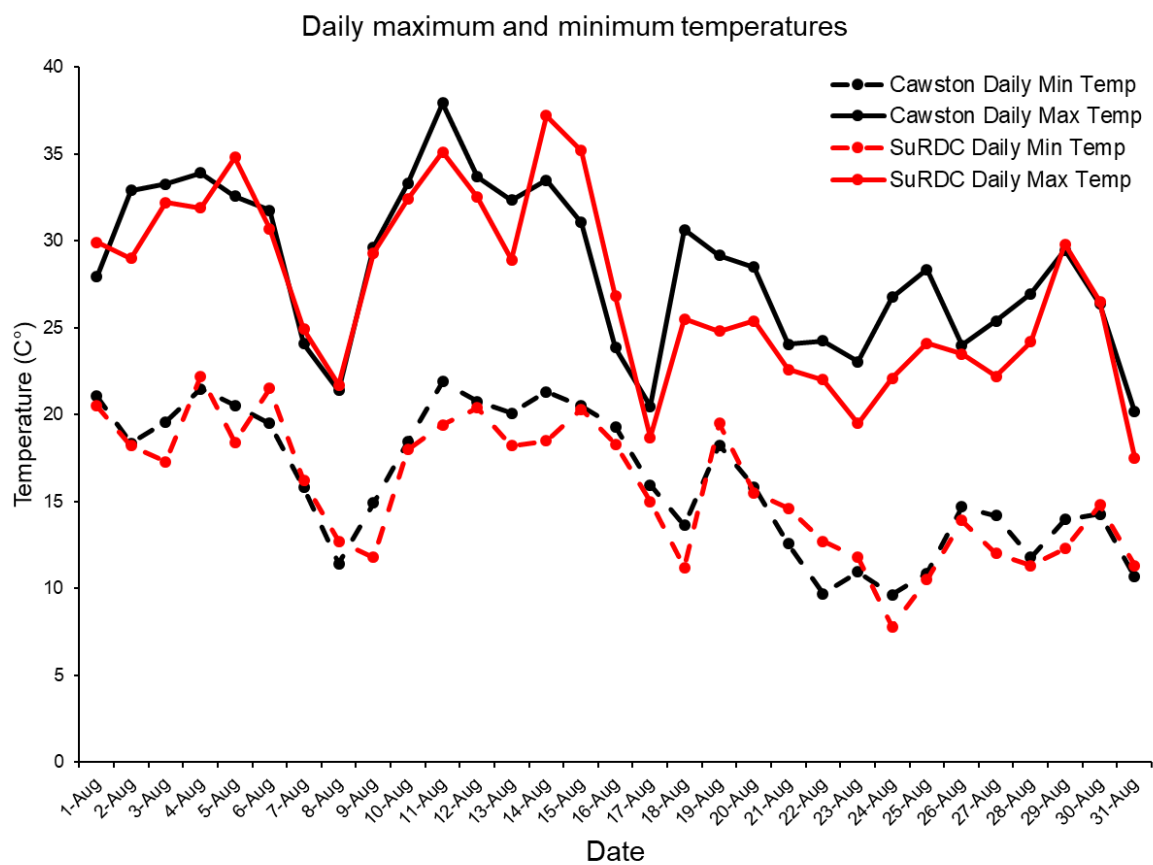

**Supplementary Figure S1.** Daily maximum and minimum temperatures in August 2021 at two study locations. Data were recorded using HOBO MX2301A sensors.
